# Supplementary material for: An international Delphi consensus for surgical quality assessment of lymphadenectomy and anastomosis in minimally invasive total gastrectomy for gastric cancer
Source: Springer Nature journal article supplement (doi:10.1007/s00464-023-10614-9), 2023-12-26
Supplement: MOESM4 [file 26565404]

**Description of the survey**

The first ten questions are related to the current position and experience in the surgical field.  
The survey regarding the procedure itself starts with question 11.

**Type of answers (from the Q 11)**

Difficulty = level of experience and skill required to complete the task effectively:

- (1) Easy (requires little experience and no use of alternative strategies to accomplish regularly)
- (3) Medium (requires some experience and use of alternative strategies to accomplish regularly)
- (5) Difficult (requires significant experience and use of alternative strategies to accomplish regularly)

Importance = how important is this task for accomplishing good outcomes of the surgery.

- (1) Not important/Optional (patient outcomes unlikely to be affected by this task)
- (3) Important (patient outcomes likely to be directly affected by this task)
- (5) Absolutely important (patient outcomes likely to be directly affected by this task)

\* 1. Name

\* 2. Institution

\* 3. What is your current position?

- Surgeon in training
- Attending surgeon
- Senior attending surgeon

Comments/Suggestions

\* 4. What is your specialty?

- General surgery
- Upper GI surgery
- HPB surgery
- Colorectal surgery

Other (please specify)

\* 5. How many years of experience do you have in minimally invasive surgery?

- <2
- 3-5
- 6-10
- 11-15
- 16-20
- >20

\* 6. How many laparoscopic total gastrectomies have you performed as a leading surgeon in total?

- <10
- 11-20
- 21-30
- 31-40
- >40

\* 7. How many laparoscopic total gastrectomies do you perform per year as a leading surgeon?

- <15
- 16-25
- 26-35
- 36-45
- 46-55
- 56-60
- >60

\* 8. What proportion of laparoscopic total gastrectomies do you perform compared to open gastrectomies?

\* 9. How many open total gastrectomies have you performed as a leading surgeon in total?

- <20
- 21-30
- 31-40
- 41-50
- 51-60
- >60

\* 10. How many open total gastrectomies do you perform as a leading surgeon per year?

- <10
- 11-20
- 21-30
- 31-40
- 41-50
- >50

\* 11. How many laparoscopic total gastrectomies are required to complete a learning curve for the procedure?

- <10
- 11-20
- 21-30
- 31-40
- >40

Other (please specify)

\* 12. Opening of the lesser omentum

- Extremely important
- Very important
- Somewhat important
- Not so important
- Not at all important

Comments/Suggestions

\* 13. Lymphadenectomy group 3

- Extremely important
- Very important
- Somewhat important
- Not so important
- Not at all important

Comments/Suggestions

\* 14. Lymphadenectomy group 3: Dissection at the lesser curvature, reaching cardia and the right crux of the diaphragm

- Extremely important
- Very important
- Somewhat important
- Not so important
- Not at all important

Comments/Suggestions

\* 15. Lymphadenectomy group 3: Dissection of the gastrocolic ligament

- Extremely important
- Very important
- Somewhat important
- Not so important
- Not at all important

Comments/Suggestions

\* 16. Lymphadenectomy group 3: Dissection towards the middle colic vessels and the inferior border of the pancreatic body and tail

- Extremely important
- Very important
- Somewhat important
- Not so important
- Not at all important

Comments/Suggestions

\* 17. Lymphadenectomy group 3: Identification of the superior mesenteric vein

- Extremely important
- Very important
- Somewhat important
- Not so important
- Not at all important

Comments/Suggestions

\* 18. Lymphadenectomy group 3: Identification of the gastrocolic trunk

- Extremely important
- Very important
- Somewhat important
- Not so important
- Not at all important

Comments/Suggestions

\* 19. Lymphadenectomy group 4d

- Extremely important
- Very important
- Somewhat important
- Not so important
- Not at all important

Comments/Suggestions

\* 20. Lymphadenectomy group 4d: Identification of the gastroduodenal artery

- Extremely important
- Very important
- Somewhat important
- Not so important
- Not at all important

Comments/Suggestions

\* 21. Lymphadenectomy group 4d: Follow the gastroduodenal artery to identify the right gastroepiploic artery

- Extremely important
- Very important
- Somewhat important
- Not so important
- Not at all important

Comments/Suggestions

\* 22. Lymphadenectomy group 4d: Lymph node dissection along the right gastroepiploic artery

- Extremely important
- Very important
- Somewhat important
- Not so important
- Not at all important

Comments/Suggestions

\* 23. Lymphadenectomy group 4d: Ligate the right gastroepiploic artery at its origin

- Extremely important
- Very important
- Somewhat important
- Not so important
- Not at all important

Comments/Suggestions

\* 24. Lymphadenectomy group 4d: Identification and ligation of the right gastroepiploic vein at the junction with the gastrocolic trunk

- Extremely important
- Very important
- Somewhat important
- Not so important
- Not at all important

Comments/Suggestions

\* 25. Lymphadenectomy group 11p

- Extremely important
- Very important
- Somewhat important
- Not so important
- Not at all important

Comments/Suggestions

\* 26. Lymphadenectomy group 11p: Identify the proximal splenic artery

- Extremely important
- Very important
- Somewhat important
- Not so important
- Not at all important

Comments/Suggestions

\* 27. Lymphadenectomy group 11p: Lymph node dissection along the proximal splenic artery

- Very easy
- Easy
- Neither easy nor difficult
- Difficult
- Very difficult

Comments/Suggestions

\* 28. Lymphadenectomy group 11p: Identify the left gastroepiploic artery and vein

- Extremely important
- Very important
- Somewhat important
- Not so important
- Not at all important

Comments/Suggestions

**\* 29. Lymphadenectomy group 4sb**

- Extremely important
- Very important
- Somewhat important
- Not so important
- Not at all important

Comments/Suggestions

**\* 30. Lymphadenectomy group 4sb: Lymph node dissection along the left gastroepiploic artery and vein**

- Very easy
- Easy
- Neither easy nor difficult
- Difficult
- Very difficult

Comments/Suggestions

**\* 31. Lymphadenectomy group 4sb: Ligate the left gastroepiploic artery and vein at least below the bifurcation of the first gastric branch**

- Extremely important
- Very important
- Somewhat important
- Not so important
- Not at all important

Comments/Suggestions

**\* 32. Lymphadenectomy group 4sa**

- Extremely important
- Very important
- Somewhat important
- Not so important
- Not at all important

Comments/Suggestions

\* 33. Lymphadenectomy group 4sa: Identify the short gastric vessels

- Extremely important
- Very important
- Somewhat important
- Not so important
- Not at all important

Comments/Suggestions

\* 34. Lymphadenectomy group 4sa: Lymph node dissection along the short gastric vessels

- Very easy
- Easy
- Neither easy nor difficult
- Difficult
- Very difficult

Comments/Suggestions

\* 35. Lymphadenectomy group 4sa: Ligate the short gastric vessels

- Extremely important
- Very important
- Somewhat important
- Not so important
- Not at all important

Comments/Suggestions

\* 36. Lymphadenectomy group 4sa: Continue dissection until the angle of His and the left crus

- Extremely important
- Very important
- Somewhat important
- Not so important
- Not at all important

Comments/Suggestions

\* 37. Lymphadenectomy group 7

- Extremely important
- Very important
- Somewhat important
- Not so important
- Not at all important

Comments/Suggestions

\* 38. Lymphadenectomy group 7: Place a retractor underneath the stomach and retract it upwards

- Extremely important
- Very important
- Somewhat important
- Not so important
- Not at all important

Comments/Suggestions

\* 39. Lymphadenectomy group 7: Lymph node dissection along the left gastric artery and vein

- Very easy
- Easy
- Neither easy nor difficult
- Difficult
- Very difficult

Comments/Suggestions

\* 40. Lymphadenectomy group 7: Division of the left gastric artery at its origin at the celiac trunk

- Extremely important
- Very important
- Somewhat important
- Not so important
- Not at all important

Comments/Suggestions

\* 41. Lymphadenectomy group 7: Division of the left gastric vein at the portal vein

- Extremely important
- Very important
- Somewhat important
- Not so important
- Not at all important

Comments/Suggestions

\* 42. Lymphadenectomy group 9

- Extremely important
- Very important
- Somewhat important
- Not so important
- Not at all important
- Comments/Suggestions

\* 43. Lymphadenectomy group 9: Lymph node dissection along the celiac trunk

- Very easy
- Easy
- Neither easy nor difficult
- Difficult
- Very difficult

Comments/Suggestions

\* 44. Lymphadenectomy groups 5 and 6

- Extremely important
- Very important
- Somewhat important
- Not so important
- Not at all important

Comments/Suggestions

\* 45. Lymphadenectomy groups 5 and 6: Dissection of the posterior side of the postpyloric part of the duodenum to create a safe passage of the stapler

- Extremely important
- Very important
- Somewhat important
- Not so important
- Not at all important

Comments/Suggestions

\* 46. Lymphadenectomy groups 5 and 6: Lymph node dissection along the inferior and superior border of the duodenum

- Very easy
- Easy
- Neither easy nor difficult
- Difficult
- Very difficult

Comments/Suggestions

\* 47. Lymphadenectomy groups 5 and 6: Division of the duodenum with 1-2 cm postpyloric

- Extremely important
- Very important
- Somewhat important
- Not so important
- Not at all important

Comments/Suggestions

\* 48. Lymphadenectomy groups 8a, 8p, and 12a

- Extremely important
- Very important
- Somewhat important
- Not so important
- Not at all important

Comments/Suggestions

\* 49. Lymphadenectomy groups 8a, 8p, and 12a: Opening the gastroduodenal ligament at the level of the hepatoduodenal ligament

- Extremely important
- Very important
- Somewhat important
- Not so important
- Not at all important

Comments/Suggestions

\* 50. Lymphadenectomy groups 8a, 8p, and 12a: Identifying the common hepatic artery

- Extremely important
- Very important
- Somewhat important
- Not so important
- Not at all important

Comments/Suggestions

\* 51. Lymph node dissection along the common hepatic artery (group 8a)

- Very easy
- Easy
- Neither easy nor difficult
- Difficult
- Very difficult

Comments/Suggestions

\* 52. Lymph node dissection of the porta, and common hepatic artery from above, down, and below (group 8p)

- Very easy
- Easy
- Neither easy nor difficult
- Difficult
- Very difficult

Comments/Suggestions

\* 53. Lymphadenectomy groups 8a, 8p, and 12a: Following the superior border of the common hepatic artery, identification of the proper hepatic artery

- Extremely important
- Very important
- Somewhat important
- Not so important
- Not at all important

Comments/Suggestions

\* 54. Lymph node dissection along the proper hepatic artery (group 12a)

- Very easy
- Easy
- Neither easy nor difficult
- Difficult
- Very difficult

Comments/Suggestions

\* 55. Lymphadenectomy groups 8a, 8p, and 12a: ligation of right gastric artery

- Extremely important
- Very important
- Somewhat important
- Not so important
- Not at all important

Comments/Suggestions

\* 56. Lymphadenectomy groups 1 and 2

- Extremely important
- Very important
- Somewhat important
- Not so important
- Not at all important

Comments/Suggestions

\* 57. Dissection of the right (group 1) and left (group 2) paracardial lymph nodes along the right and left crus

- Very easy
- Easy
- Neither easy nor difficult
- Difficult
- Very difficult

Comments/Suggestions

\* 58. Lymphadenectomy groups 11d and 10

- Extremely important
- Very important
- Somewhat important
- Not so important
- Not at all important

Comments/Suggestions

\* 59. Lymphadenectomy groups 11d and 10: Division of the posterior gastric vessels at their origin from the splenic artery

- Extremely important
- Very important
- Somewhat important
- Not so important
- Not at all important

Comments/Suggestions

\* 60. Lymph node dissection along the distal splenic artery (group 11d)

- Very easy
- Easy
- Neither easy nor difficult
- Difficult
- Very difficult

Comments/Suggestions

\* 61. Lymph node dissection of the splenic hilum (group 10)

- Very easy
- Easy
- Neither easy nor difficult
- Difficult
- Very difficult

Comments/Suggestions

\* 62. Are resected lymph nodes intact?

- Extremely important
- Very important
- Somewhat important
- Not so important
- Not at all important

Comments/Suggestions

\* 63. Performing omentectomy

- Extremely important
- Very important
- Somewhat important
- Not so important
- Not at all important

Comments/Suggestions

\* 64. General aspects of the anastomosis: Transection at least 5 cm proximally to the tumor

- Extremely important
- Very important
- Somewhat important
- Not so important
- Not at all important

Comments/Suggestions

**\* 65. General aspects of the anastomosis: Skillful creation of the anastomosis**

- Extremely important
- Very important
- Somewhat important
- Not so important
- Not at all important

Comments/Suggestions

**\* 66. General aspects of the anastomosis: Safety and efficiency**

- Extremely important
- Very important
- Somewhat important
- Not so important
- Not at all important

Comments/Suggestions

**\* 67. General aspects of the anastomosis: Assessment of the vascularization (subjective visual, hyperspectral camera imaging, ICG, or other)**

- Extremely important
- Very important
- Somewhat important
- Not so important
- Not at all important

Comments/Suggestions

**\* 68. General aspects of the anastomosis: Leakage test**

- Extremely important
- Very important
- Somewhat important
- Not so important
- Not at all important

Comments/Suggestions

\* 69. General aspects of the anastomosis: Tension- and torsion-free anastomosis

- Extremely important
- Very important
- Somewhat important
- Not so important
- Not at all important

Comments/Suggestions
