# Supplementary material for: An international Delphi consensus for surgical quality assessment of lymphadenectomy and anastomosis in minimally invasive total gastrectomy for gastric cancer
Source: Springer Nature journal article supplement (doi:10.1007/s00464-023-10614-9), 2023-12-26
Supplement: MOESM5 [file 26565404]

**Description of the survey**

This is the second round of the Delphi Questionnaire for the Quality Assessment of Anastomosis and Lymphadenectomy in Laparoscopic Total Gastrectomy (The ANALYTIQS Study).

**Type of answers**

Difficulty = level of experience and skill required to complete the task effectively:

- (1) Easy (requires little experience and no use of alternative strategies to accomplish regularly)
- (3) Medium (requires some experience and use of alternative strategies to accomplish regularly)
- (5) Difficult (requires significant experience and use of alternative strategies to accomplish regularly)

Importance = how important is this task for accomplishing good outcomes of the surgery?

- (1) Not important/Optional (patient outcomes unlikely to be affected by this task)
- (3) Important (patient outcomes likely to be directly affected by this task)
- (5) Absolutely important (patient outcomes likely to be directly affected by this task)

D2 Lymphadenectomy

\* 1. Name

\* 2. Institution

\* 3. Is the dissection of the gastrocolic ligament an important step of total gastrectomy and to facilitate lymphadenectomy?

- Extremely important
- Very important
- Somewhat important
- Not so important
- Not at all important

Comments/Suggestions

\* 4. How important is identifying the superior mesenteric vein as a necessary step of lymphadenectomy for total gastrectomy?

- Extremely important
- Very important
- Somewhat important
- Not so important
- Not at all important

Comments/Suggestions

\* 5. Station 4d lymphadenectomy: how important is the identification and ligation of the right gastroepiploic vein at its root or ligation of the gastrocolic trunk?

- Extremely important
- Very important
- Somewhat important
- Not so important
- Not at all important

Comments/Suggestions

\* 6. How important is the identification of the left gastroepiploic artery and vein as a step towards station 4sb lymphadenectomy?

- Extremely important
- Very important
- Somewhat important
- Not so important
- Not at all important

Comments/Suggestions

\* 7. How important is the station 4sa lymphadenectomy in case of tumor localization on greater curvature, fundus, or corpus of the stomach?

- Extremely important
- Very important
- Somewhat important
- Not so important
- Not at all important

Comments/Suggestions

\* 8. How important is the station 4sa lymphadenectomy, irrespective of tumor localization?

- Extremely important
- Very important
- Somewhat important
- Not so important
- Not at all important

Comments/Suggestions

\* 9. Station 4sa lymphadenectomy: how important is it to identify and ligate the short gastric vessels?

- Extremely important
- Very important
- Somewhat important
- Not so important
- Not at all important

Comments/Suggestions

\* 10. Station 4sa lymphadenectomy: how important is it to ligate the left gastroepiploic artery and vein close to their origin?

- Extremely important
- Very important
- Somewhat important
- Not so important
- Not at all important

Comments/Suggestions

\* 11. How difficult is the station 4sa lymphadenectomy?

- Very easy
- Easy
- Neither easy nor difficult
- Difficult
- Very difficult

Comments/Suggestions

\* 12. How important is it to retract the vascular pedicle of the stomach upwards to improve visualization and dissect the left gastric artery and vein in station 7 lymphadenectomy?

- Extremely important
- Very important
- Somewhat important
- Not so important
- Not at all important

Comments/Suggestions

\* 13. Station 7 lymphadenectomy: how difficult is the lymph node dissection along the left gastric artery and vein?

- Very easy
- Easy
- Neither easy nor difficult
- Difficult
- Very difficult

Comments/Suggestions

\* 14. Station 7 lymphadenectomy: how important is the division of the left gastric vein at the upper border of the pancreas?

- Extremely important
- Very important
- Somewhat important
- Not so important
- Not at all important

Comments/Suggestions

\* 15. Station 9 lymphadenectomy: how difficult is the lymph node dissection along the celiac trunk?

- Very easy
- Easy
- Neither easy nor difficult
- Difficult
- Very difficult

Comments/Suggestions

\* 16. Stations 5 and 6 lymphadenectomies: how difficult is the lymph node dissection along the inferior and superior border of the proximal duodenum?

- Very easy
- Easy
- Neither easy nor difficult
- Difficult
- Very difficult

Comments/Suggestions

\* 17. How difficult is it to perform a sufficient lymph node dissection along the common hepatic artery (station 8a)?

- Very easy
- Easy
- Neither easy nor difficult
- Difficult
- Very difficult

Comments/Suggestions

\* 18. How difficult is it to perform a sufficient lymph node dissection along the proper hepatic artery (station 12a)?

- Very easy
- Easy
- Neither easy nor difficult
- Difficult
- Very difficult

Comments/Suggestions

\* 19. How important is the dissection of the right (station 1) and left (station 2) paracardial lymph node dissection along the right and left crus?

- Extremely important
- Very important
- Somewhat important
- Not so important
- Not important at all

Comments/Suggestions

\* 20. How important is the station 11d lymphadenectomy?

- Extremely important
- Very important
- Somewhat important
- Not so important
- Not at all important

Comments/Suggestions

\* 21. Station 11d lymphadenectomy: how important is the division of the posterior gastric vessels at their origin from the splenic artery?

- Extremely important
- Very important
- Somewhat important
- Not so important
- Not at all important

Comments/Suggestions

\* 22. How difficult is the lymph node dissection along the distal splenic artery (station 11d) without splenectomy?

- Very easy
- Easy
- Neither easy nor difficult
- Difficult
- Very difficult

Comments/Suggestions

\* 23. How important is the lymphadenectomy of station 10 in patients with tumors of greater curvature or close to the spleen?

- Extremely important
- Very important
- Somewhat important
- Not so important
- Not at all important

Comments/Suggestions

\* 24. Is the lymphadenectomy of station 10 important in patients with tumors that are not close to the greater curvature or spleen?

- Extremely important
- Very important
- Somewhat important
- Not so important
- Not at all important

Comments/Suggestions

\* 25. How important is the omentectomy irrespective of the tumor stage?

- Extremely important
- Very important
- Somewhat important
- Not so important
- Not at all important

Comments/Suggestions

\* 26. How important is the omentectomy for advanced tumor stages (T3/T4)?

- Extremely important
- Very important
- Somewhat important
- Not so important
- Not at all important

Comments/Suggestions

\* 27. General aspects of the anastomosis: Should frozen section always be performed to ensure negative margins?

- Yes
- No

Comments/Suggestions

\* 28. General aspects of the anastomosis: Should the frozen section be performed if the tumor location is perceived close to the margin?

Yes

No

Comments/Suggestions

\* 29. General aspects of the anastomosis: Is a tumor-free resection margin sufficient after neoadjuvant treatment irrespective of the distance from margin?

Yes

No

Comments/Suggestions

\* 30. General aspects of the anastomosis: Is a tumor free resection margin sufficient without neoadjuvant treatment irrespective of the distance from margin?

Yes

No

Comments/Suggestions

\* 31. General aspects of anastomosis: How important is the assessment of the vascularization of the anastomosis with visual assessment?

Extremely important

Very important

Somewhat important

Not so important

Not at all important

Comments/Suggestions



\* 32. General aspects of anastomosis: How important is the assessment of the vascularization of the anastomosis with intraoperative imaging such as fluorescence or hyperspectral camera imaging?

- Extremely important
- Very important
- Somewhat important
- Not so important
- Not at all important

Comments/Suggestions

\* 33. General aspects of the anastomosis: Do you perform a routine leakage test?

- Yes
- No

Comments/Suggestions

\* 34. General aspects of the anastomosis: How important is the leakage test if performing the anastomosis was technically challenging?

- Extremely important
- Very important
- Somewhat important
- Not so important
- Not at all important

Comments/Suggestions
